# HIV Care Prioritization using Phylogenetic Branch Length

NIEMA MOSHIRI<sup>1</sup>, DAVEY M. SMITH<sup>2</sup>, AND SIAVASH MIRARAB,<sup>3,\*</sup>

<sup>1</sup> *Department of Computer Science and Engineering, University of California, San Diego, La Jolla, 92093, USA*

<sup>2</sup> *Department of Medicine, University of California, San Diego, La Jolla, 92093, USA*

<sup>3</sup> *Department of Electrical and Computer Engineering, University of California, San Diego, La Jolla, 92093, USA*

*\*Siavash Mirarab, Department of Electrical and Computer Engineering, University of California, San Diego, 9500 Gilman Drive, Mail Code 0407, La Jolla, USA, 92093-0407, 858-822-6245, smirarab@ucsd.edu*

## ABSTRACT

1 In HIV epidemics, the structure of the transmission network can be dictated by just a few  
2 individuals. Public health intervention, such as ensuring people living with HIV adhere to  
3 antiretroviral therapy (ART) and are continually virally-suppressed, can help control the  
4 spread of the virus. However, such intervention requires utilizing the limited public health  
5 resource allocations. As a result, the ability to determine which individuals are most  
6 at-risk of transmitting HIV could allow public health officials to focus their limited  
7 resources on these individuals. Molecular epidemiology suggests an approach: prioritizing  
8 people living with HIV based on patterns of transmission inferred from their sampled viral  
9 sequences. In this paper, we introduce ProACT (**P**rioritization using **AnCesT**ral edge  
10 lengths), a phylogenetic approach for prioritizing individuals living with HIV. ProACT  
11 uses a simple idea: ordering individuals by their terminal branch length in the phylogeny of  
12 their virus. In simulations and also on a dataset of HIV-1 subtype B *pol* sequences  
13 obtained in San Diego, we show that this simple strategy improves the effectiveness of

14 prioritization compared to state-of-the-art methods that rely on monitoring the growth of  
15 transmission clusters defined based on genetic distance.

16 *Key words:* HIV, epidemiology, phylogenetics

17

18 The transmission of Human Immunodeficiency Virus (HIV) resembles scale-free  
19 networks (Wertheim et al., 2014), in which the majority of the structure of the network is  
20 dictated by just a few individuals, a phenomenon likely resulting from the scale-free  
21 properties of sexual contacts and injection drug use along which HIV is transmitted (Little  
22 et al., 2014; Schneeberger et al., 2004). As a result, public health intervention may be more  
23 effective when targeted at people living with HIV (PLWH for short) who are more likely to  
24 grow the transmission network. However, the best method to target individuals for specific  
25 interventions remains an open question, and the best strategy will likely depend on the  
26 specific intervention planned.

27 A potential form of intervention aiming to reduce future transmissions is to target  
28 PLWHs. Antiretroviral therapy (ART) is an effective treatment of HIV that suppresses the  
29 HIV virus in the majority of cases, stops the progression of the disease, and prevents  
30 onward transmission to an uninfected sexual partner, provided the PLWH continuously  
31 adheres to the treatment (Cohen et al., 2011). In most advanced health care systems, ART  
32 is made available routinely to newly diagnosed patients, but several opportunities for  
33 further intervention remains available. Most importantly, not every diagnosed person  
34 initiates ART and not all cases of ART initiation lead to a sustained suppression of the  
35 virus through time. PLWHs who start ART but fail to sustain it or who are otherwise  
36 unsuppressed can still infect others. Thus, a possible intervention is to use public health  
37 resources to help known PLWHs stay on ART and to remain continually suppressed (Poon  
38 et al., 2016). Such interventions require allocation of clinical staff who would follow up  
39 with patients to provide them further assistance in adherence sustenance of ART. They

40 health system can also provide increased testing to these individuals to ensure suppression.  
41 A second family of interventions involves targeting HIV negative individuals connected to  
42 high priority PLWHs. The health system can use partner tracing (Gotz et al., 2014) to  
43 identify the sexual partners of high-priority PLWHs (as best as possible), test these high  
44 risk individuals, and offer them either treatment (for positives) or prevention through  
45 PrEP (for negatives). Finally, if the priority status of individuals shows any association  
46 with specific geographical or demographic groups (beyond known associations), the public  
47 health system can design strategies for further outreach, testing, and PrEP administration  
48 for the impacted groups.

49 All three types of intervention are costly and cannot be undertaken for every known  
50 PLWH or groups. If diagnosed people at risk of not being suppressed could be predicted  
51 accurately, the public health system could focus their limited resources on these  
52 individuals. Thus, a natural question surfaces: which individuals are most at-risk of  
53 transmitting HIV? However, predicting tendency for future transmissions is difficult and  
54 can also be problematic if undertaken primarily based on demographic or behavioral traits.

55 Molecular epidemics suggest an alternative method: prioritizing PLWHs for  
56 intervention solely based on patterns of transmission inferred from HIV sequence  
57 data (Bbosa et al., 2019; Villandr e et al., 2019; Oster et al., 2018; Ragonnet-Cronin et al.,  
58 2019; Wertheim et al., 2018, 2011, 2014; Smith et al., 2009). The inference of transmission  
59 networks using phylogenetic or distance-based methods has been the subject of much  
60 research (e.g. Leitner and Romero-Severson, 2018; Kosakovsky Pond et al., 2018;  
61 Ragonnet-Cronin et al., 2013; Prospero et al., 2011). However, in this work, instead of  
62 being concerned with inferring exact patterns of transmissions, we ask the following  
63 question: given molecular data from a set of *sequenced* PLWHs (“samples” for short), who  
64 should be prioritized for further intervention?

65 Prioritizing care based on molecular epidemics has been studied recently. Wertheim  
66 et al. (2018) present a method for prioritizing samples based on performing transmission

67 clustering (i.e., grouping individuals with low viral genetic distance into *transmission*  
68 *clusters*) and ordering clusters by growth rate. On a large dataset from New York, they  
69 show that the approach is able to predict individuals who have relatively larger numbers of  
70 transmission links in the near future. Moshiri et al. (2018) have studied the same question  
71 in simulations and have shown that monitoring cluster growth can be used for predicting  
72 future transmissions substantially better than a random guess, whether clusters are defined  
73 using genetic distances or using phylogenetic methods. Most recently, Balaban et al. (2019)  
74 showed in simulations that using a cluster-monitoring approach similar to that of  
75 Wertheim et al. (2018) but defining clusters using a min-cut optimization problem gives a  
76 small but consistent improvement over defining clusters using genetic distances.

77 In this paper, we introduce a new method for ordering samples based on their  
78 phylogenetic relationships. Instead of relying on clustering individuals and then ordering  
79 clusters based on their growth, we seek to order individuals without clustering and without  
80 reliance on parametric models. Instead, we seek to simply exploits patterns in the  
81 phylogeny, and in particular, in branch lengths.

## 82 MATERIALS AND METHODS

83 ProACT (**P**rioritization using **AnCesTral** edge lengths) takes as input the inferred  
84 phylogenetic relationships between sampled HIV viruses (e.g. from the *pol* region), rooted  
85 using an outgroup or clock-based methods (e.g. midpoint or MinVar-root, Mai et al.  
86 (2017)). ProACT simply orders samples in order of incident branch length of their  
87 associated virus, and it breaks ties based on incident branch lengths of parent nodes, then  
88 those of grandparent nodes, etc. We first motivate the approach and then present a formal  
89 definition of the method.

90 We note that ProACT is motivated and tested in a context similar to the present  
91 day health care systems that enjoy enough resources to provide ART to all (or at least  
92 most) diagnosed individuals. Thus, each sample can be assumed to be given ART at a time

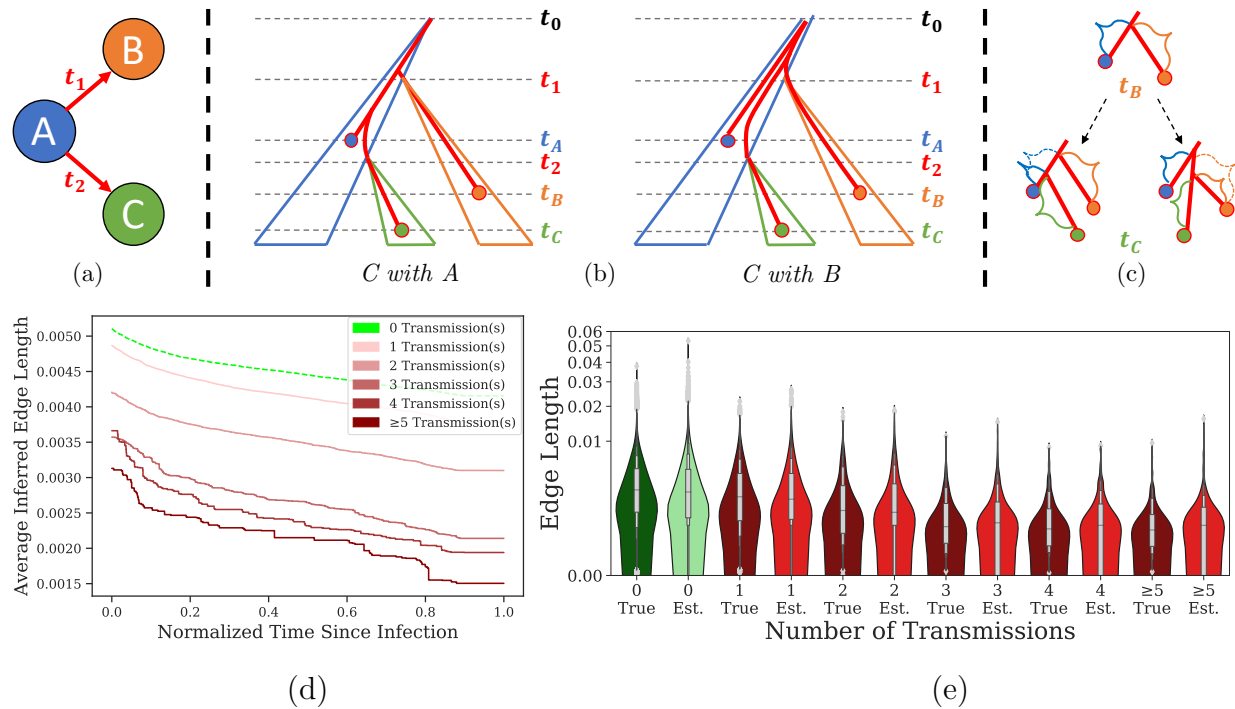

Fig. 1. The effect of new transmissions on incident branch lengths. (a) Individual *A* transmits to individual *B* and *C* at times at  $t_1$  and  $t_2$ , respectively. (b) Viral samples are obtained from individuals *A*, *B*, and *C* at times  $t_A$ ,  $t_B$ , and  $t_C$ . The viral phylogeny of samples is constrained by each transmission event’s bottleneck, and the most likely phylogeny matches the transmission history (Left), but in the less likely deeper coalescence, it may not match (Right). (c) Moving from the phylogeny observed at time  $t_B$  to the phylogeny at time  $t_C$ , the branch length incident to individual *A* shortens upon the addition of individual *C* in the likely event that the coalescence of the lineage from *C* with the lineage from *A* is more recent than its coalescence with the lineage from *B* (Left), or the branch length incident to individual *A* remains constant in the event of a less likely deeper coalescence (Right). Regardless, the length of the branch incident to individual *A* never increases. In simulation, we can observe this trend: as time progresses, the incident branch length of each individual tends to decrease, both in true (Fig. S1) and inferred (d) phylogenies, and as the number of transmissions from a given individual increases, the distribution of incident edge length tends to decrease, both in true and inferred phylogenies, labeled “True” and “Est.,” respectively (e).

93 close to when their HIV is sequenced, but they may fail to be suppressed for the remainder  
 94 of their life. These conditions describe the common practice of care in many advanced and  
 95 (increasingly) developing countries.

96 *Motivating the Approach*

97 We start with the observation that, in simulations (described in detail below), when  
 98 a phylogeny is inferred from sequences obtained at a given time point in an epidemic, the

99 more a node transmits, the shorter its incident branch length tends to be (Figs. 1d–e  
100 and S2). Using the Kendall’s Tau-b test (Kendall, 1938), in a ten-year epidemic simulation  
101 (details described below), we found a statistically significant anticorrelation between the  
102 incident branch lengths of individuals sampled within the first 9 years of the epidemic and  
103 the number of individuals they infected over the final year of the epidemic. This held for  
104 true ( $\tau_B = -0.0431$ ,  $p \ll 10^{-10}$ ) and inferred ( $\tau_B = -0.0354$ ,  $p \ll 10^{-10}$ ) phylogenetic  
105 trees. Though not obvious, this observation can be explained by the constraints placed  
106 upon the viral phylogeny by the transmission history (Fig. 1a–c).

107 In the context of HIV epidemiology in many advanced countries, samples are  
108 typically sequenced upon beginning Antiretroviral Therapy (ART). Let’s assume for  
109 simplicity that every individual in the given dataset has at some point initiated ART,  
110 meaning future transmissions by individuals in the dataset must happen only if the source  
111 stops ART or is otherwise unsuppressed. Given a viral phylogeny containing all known  
112 samples, if, in the future, individual  $u$  in the dataset transmits to individual  $v$ , there are  
113 two possible scenarios regarding the placement of the leaf corresponding to  $v$  in the  
114 existing (true) phylogeny: (1)  $v$  is placed on the edge incident to  $u$ , so the edge incident to  
115  $u$  will shorten, or (2)  $v$  is not placed on the edge incident to  $u$ , so the edge incident to  $u$   
116 will remain the same length. Although Scenario 2 is possible, Scenario 1 is far more likely  
117 (Romero-Severson et al., 2016), and note that the terminal branch lengths do not increase  
118 in either scenario. Thus, as time goes by, the terminal branch can only shorten or stay  
119 fixed, and it will most often shorten because of new transmissions by the sample associated  
120 with that terminal branch. This pattern, easily observed in simulations (Fig. 1d), leads to  
121 shorter branches for samples who have transmitted recently.

122 Note that samples who transmit are unsuppressed. The first time they infect others,  
123 their terminal branch length is likely to decrease, and further transmissions further  
124 decrease their terminal branch lengths (Fig. 1d). Thus, one expects nodes with smaller  
125 incident branch length to be more likely to have transmitted since their sampling time.

126 Moreover, they are also likely to transmit in the near future because they are likely not to  
127 be suppressed. The higher probability of a lack of suppression makes them a good  
128 candidate for intervention.

### 129 *Formal Description*

130 ProACT takes as input a *rooted* phylogenetic tree  $T$  of viral samples. Let  $bl(u)$   
131 denote the incident branch length of node  $u$ , and assume the incident branch length of the  
132 root of  $T$  is 0. Let  $a(u)$  denote the vector of ancestors of node  $u$  (including  $u$ ), where  $a(u)_1$   
133 is  $u$ ,  $a(u)_2$  is the parent of  $u$ ,  $a(u)_3$  is the grandparent of  $u$ , etc. Let  $r(u)$  denote the length  
134 of the path from node  $u$  to the root of  $T$ , i.e.,  $r(u) = \sum_{v \in a(u)} bl(v)$ . ProACT sorts the  
135 leaves of  $T$  in ascending order of  $bl(a(u)_1)$ , with ties broken by  $bl(a(u)_2)$ , then by  $bl(a(u)_3)$ ,  
136 etc. Note that, for two leaves  $u$  and  $v$ ,  $|a(u)|$  may be less than  $|a(v)|$ , in which case, for all  
137  $|a(u)| < i \leq |a(v)|$ ,  $\frac{r(u)}{|a(u)|-1}$  (i.e., average branch length along the path from  $u$  to the root of  
138  $T$ ) is compared with  $bl(a(v)_i)$  instead. If two nodes are equal in all comparisons, if the user  
139 provides sample times, the earlier sample time is given higher priority; otherwise, ties are  
140 broken arbitrarily. Because sorting is needed, for a tree with  $n$  leaves, assuming branch  
141 lengths are fairly unique, the ProACT algorithm runs in  $\mathcal{O}(n \log n)$  time. Scalable methods  
142 exist both for the inferring (e.g. Price et al., 2010; Nguyen et al., 2015) and rooting (e.g.  
143 Mai et al., 2017) very large trees.

## 144 RESULTS

145 We evaluate ProACT on simulated and real data.

### 146 *Simulation Results*

147 In order to test ProACT's efficacy, we performed a series of simulation experiments  
148 in which we used FAVITES (Moshiri et al., 2018) to generate a sexual contact network,  
149 transmission network, viral phylogeny, and viral sequences emulating HIV transmission in

| Parameter                                                 | Values                                                                |
|-----------------------------------------------------------|-----------------------------------------------------------------------|
| ART Initiation Rate ( $\lambda_+$ , year <sup>-1</sup> )  | <b>1, 2, 4</b>                                                        |
| ART Termination Rate ( $\lambda_-$ , year <sup>-1</sup> ) | 0.12 (0.25x), 0.24 (0.5x),<br><b>0.48 (1x)</b> , 0.96 (2x), 1.92 (4x) |
| Expected Degree ( $\bar{E}_d$ )                           | <b>10, 20, 30</b>                                                     |

Table 1. Varied HIV simulation parameters. Values for the base model condition are shown in bold.

150 San Diego from 2005 to 2014 (Material and Methods). We have simulated nine model  
 151 conditions (Table 1) by starting from a base model condition and varying the rate of ART  
 152 initiation ( $\lambda_+$ ), rate of ART termination ( $\lambda_-$ ), and the expected degree of the sexual  
 153 network ( $E_d$ ). We subsequently inferred and rooted a phylogeny of all sequences obtained  
 154 during the first 9 years of the simulation. Then, ProACT was run on the true and inferred  
 155 full trees and subsampled trees.

156 To measure the efficacy of a given prioritization, we compute the number of  
 157 infections caused by each individual during the 10th year of the simulation (our outcome  
 158 measure). Then, we measure the cumulative moving average (CMA) of the outcome  
 159 measure by the top samples. The higher the CMA in a prioritization, the higher the  
 160 number of future transmissions from these top individuals, and thus, the higher the  
 161 effectiveness of the prioritization. Moreover, sorting individuals by their outcome measure  
 162 (known to us in simulations) enables us to compute the optimal CMA curve, and the mean  
 163 number of transmissions gives us the expected value of the CMA for a random  
 164 prioritization. Across experimental conditions, the maximum and random expectations  
 165 vary. Thus, to enable proper comparison of effects of prioritization across conditions, we  
 166 also report an adjusted CMA normalizing above the random prioritization and over the  
 167 optimal prioritization (see Materials and Methods). For this Adjusted  
 168 Transmissions/Person metric, 1 indicates the optimal ordering and 0 indicates an ordering  
 169 that is no better than random (a negative value indicates an ordering that is *worse* than  
 170 random). Finally, we use Kendall's Tau-b coefficient to measure the correlation between



171 the optimal ordering and the ordering obtained using each method. Kendall's Tau-b is a  
172 rank correlation coefficient adjusted for ties (Kendall, 1938) with values ranging between -1  
173 and 1, with -1 signifying perfect inversion, 1 signifying perfect agreement, and 0 signifying  
174 the absence of association.

175 *Default condition*— ProACT dramatically increased the performance compared to  
176 random ordering according to all of our outcome measures (Fig. 2). Focusing on the  
177 transmissions per person measure, while the population mean was 0.05, the ProACT's  
178 CMA was close to 0.15 for the top 1% of prioritized samples and gradually reduced to 0.1  
179 for the top 10% (Fig. 2a). The top 1000 individuals in the ProACT ordering (3% of the  
180 population) transmitted 0.12 times (median across our 20 replicates), which was 2.4x  
181 higher than the median population average (Fig. 2c; see also Fig. S3 for numbers other  
182 than 1000). As desired, selecting fewer people from the top of ProACT prioritization  
183 resulted in more transmissions per person (Fig. 2a). Compared to optimal ordering,  
184 however, the adjusted score both increased and decreased as more individuals were selected  
185 (Fig. 2b). The adjusted metric shows that while ProACT substantially outperformed  
186 random ordering, it did not come close to the effectiveness that could be achieved using  
187 the (hypothetical) perfect ordering. The Kendall's Tau-b correlation also showed a positive  
188 correlation between ProACT ordering and optimal ordering; although the correlation  
189 coefficient is far from perfect (Fig. 2d), the correlations are statistically significant in all  
190 replicates ( $p < 10^{-9}$ ; see Fig. S7a).

191 Wertheim et al. (2018) have presented a method for prioritizing samples by  
192 clustering individuals based on viral genetic distance, tracking the size of each cluster over  
193 time, and prioritizing clusters in descending order of the growth rate. The approach can be  
194 extended to also order individuals (i.e., individuals belonging to clusters with high growth  
195 rates are prioritized higher; see Materials and Methods for details). ProACT consistently  
196 outperformed prioritization using cluster growth (Figs. 2). For example, the top 1000  
197 individuals according to cluster growth transmitted on average to 0.06 other people, which,

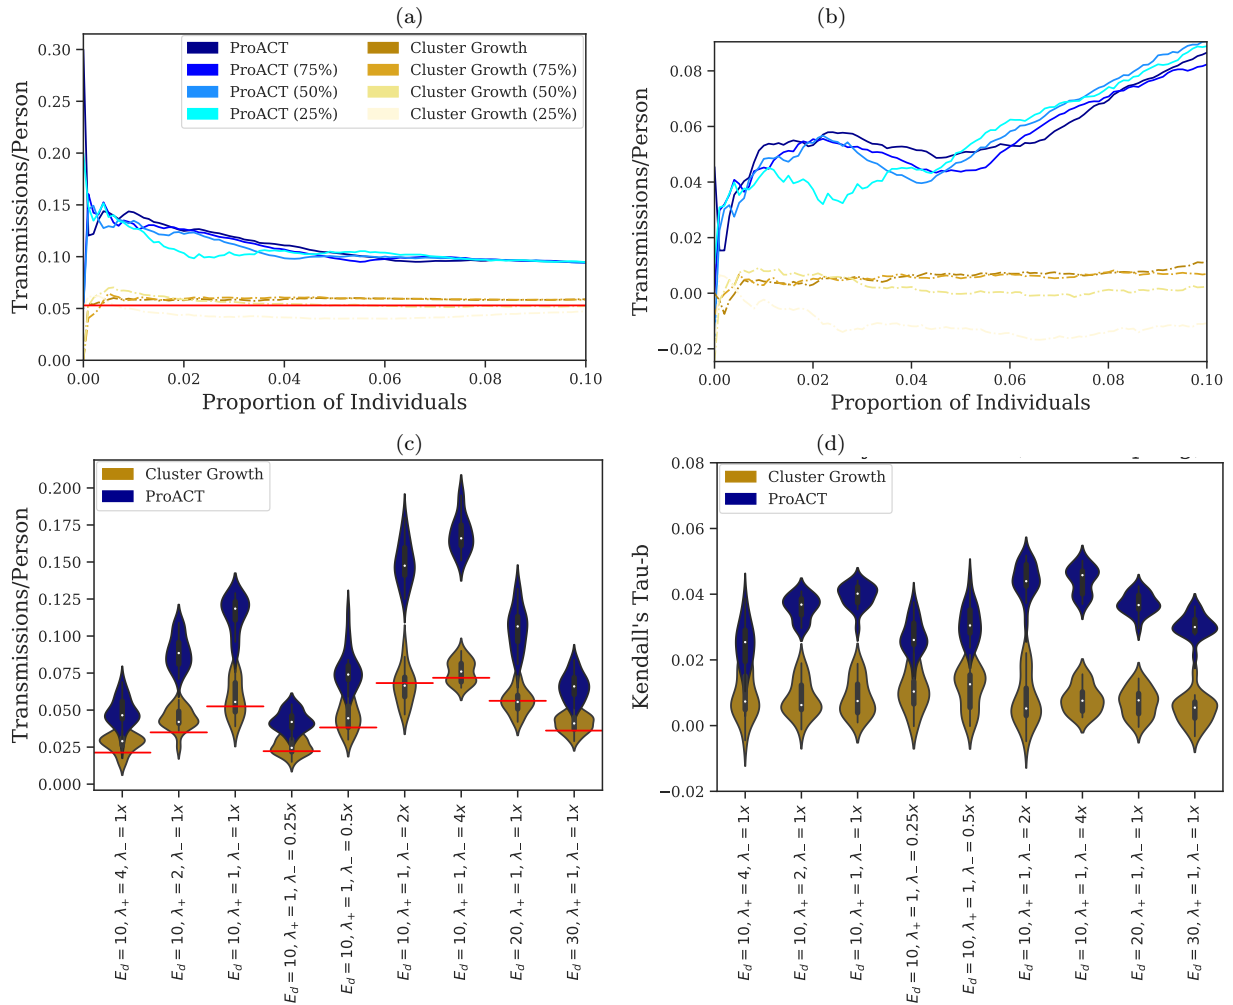

Fig. 2. Effectiveness of prioritization on simulated datasets. The simulations were 10 years in length, prioritization was performed 9 years into the simulation, and the effectiveness of prioritization was computed during the last year of the simulation using four metrics (a-d). “Cluster Growth” denotes prioritization by inferring transmission clusters using HIV-TRACE at year 9 of the simulation and sorting clusters in descending order of growth rate since year 8. All curves were calculated using 20 simulation replicates. (a) Cumulative Moving Average (CMA) of the number of transmissions per person across the first decile of prioritized samples for the default simulation parameter set (see Fig. S4 for all model conditions, which show similar patterns.) The horizontal axis depicts the quantile of highest-prioritized samples (e.g.  $x = 0.01$  denotes the top percentile), and the vertical axis depicts their average number of transmissions per person. Global average across all individuals (i.e., expectation under random ordering) is shown in red. The curves labeled with percentages denote subsampled datasets. (b) CMA of *adjusted* number of transmissions per person for the default model condition (See Fig. S5 for all model conditions, which show similar patterns.) For *adjusted* Transmissions/Person, 1 indicates the optimal ordering and 0 indicates random ordering. All other settings are similar to part a. (c) Average of the raw number of transmissions per person for the top 1000 individuals (see Fig. S3 for other counts) in a prioritized list vs. simulation parameter set (1000 individuals correspond to 1%–6% of all individuals across conditions). The violin plots are across 20 replicates and contain box plots with medians shown as white dots. Red horizontal lines show population mean (i.e., random prioritization). (d) Kendall Tau-b correlation between the optimal ordering of samples (i.e., based on their number of transmissions in year 10) and the orderings by the two prioritization methods. See Figure S6 for subsampled data. Distributions are across 20 replicates and are shown for each simulation condition.

198 while higher than the population average, was half the 0.12 transmissions per person  
199 according to ProACT. Kendall-Tau results similarly indicate that ProACT has better  
200 correlation with the optimal ordering.

201 *Impact of simulation parameters*— We then tested the impact of three simulation  
202 parameters, namely the rate of stopping ART, the rate of starting ART, and the node  
203 degree in the sexual network (Figs. 2cd, S4, and S5).

204 As we increased the rate of stopping ART ( $\lambda_-$ ) (i.e., with lower adherence), the gap  
205 between ProACT and cluster growth grew. For example, the mean number of  
206 transmissions per person among the top 1,000 individuals chosen using ProACT and  
207 cluster growth were respectively 0.169 and 0.076 (a 1.21x improvement) for the condition  
208 with  $\lambda_- = 4x$  (Fig. 2c). This 1.21x improvement briefly increased to 1.26x and  
209 subsequently gradually decreased to 1.01x, 0.69x, and 0.63x as we reduced the rate of ART  
210 termination to 2x, 1x, 0.5x, and 0.25x. Kendall-Tau-b correlations show similar patterns  
211 (Fig. 2d); while almost all replicates of  $\lambda_- = 4x$  have  $p < 10^{-20}$ , for the 0.25x case, all  
212 replicates have  $p > 10^{-10}$  and one of the replicates has  $p > 10^{-3}$  (Fig. S7a).

213 As we increased the rate of starting ART ( $\lambda_+$ ) (i.e., with faster diagnoses), as  
214 expected, the raw number of new infections caused per capita also reduced (Fig. 2c, S4a).  
215 While ProACT remained effective in finding high priority individuals, its performance  
216 compared to optimal ordering slightly degraded with higher  $\lambda_+$  (Figs. 2d and S5a). Also,  
217 the gap between ProACT and cluster growth decreased slightly. When observing the mean  
218 number of transmissions per person among the top 1,000 individuals chosen by each  
219 method (Fig. 2c), ProACT gave a 1.01x, 1.03x, and 0.71x improvement over cluster growth  
220 for  $\lambda_+$  set to 1x, 2x, and 4x, respectively.

221 Changing the expected number of sexual contacts per person ( $E_d$ ), which controls  
222 the speed of spread, did not have uniform effects (Figs. 2cd). Increasing  $E_d$  from 10 to 20  
223 did not substantially impact the performance of ProACT. However, for  $E_d = 30$ , we  
224 observed a small but noticeable reduction in the performance of ProACT compared to the

225 optimal ordering and cluster growth (Figs. 2d and S5d).

226 *Impact of incomplete sampling*— Subsampling the total dataset to include  $3/4$ ,  $1/2$ ,  
227 or  $1/4$  of all samples had only a marginal impact on the performance of ProACT according  
228 to the CMA metric (Figs. 2ab, S4, S5). Only at 25% sampling level did we observe a small  
229 reduction in the performance of ProACT compared to the optimal ordering. For example,  
230 with  $\lambda_+ = 2x$ , ProACT's performance remained quite similar across  $\geq 1/2$  sampling levels,  
231 but a reduction in performance was observed for the  $1/4$  sampling level for both ProACT  
232 and cluster growth (Fig. S5a).

233 According to Kendall's Tau-b, which measures the entire order not just the top  
234 individuals, there was a more noticeable degradation in performance due to sampling  
235 (Fig. S6). In particular, reduced sampling increased the *variance* across replicate  
236 simulations (note the wider distributions for reduced sampling in Fig. S6). Moreover,  
237 statistical significance of the correlations degrades with lower sampling (Fig. S7c–e). With  
238  $1/4$  sampling, unlike full sampling, many model conditions include *some* replicates where  
239 the ProACT ordering is not significantly better than random according to Kendall's Tau-b.

240 *Second order effects*— We next asked if prioritization is effective in detecting  
241 people whose contacts also transmit abundantly. To do so, we explored a new outcome  
242 measure: the total number of transmissions from all contacts of a sample. Prioritizing  
243 samples whose contacts are likely to transmit can give public health officials a chance to  
244 find undiagnosed individuals (likely to transmit) through partner tracing from diagnosed  
245 individuals and to prioritize PrEP for uninfected individuals.

246 Across all model parameters, ProACT ordering outperformed random ordering and  
247 cluster growth according to the number transmissions per neighbor (Fig. 3). For example,  
248 contacts of the top 1000 individuals according to ProACT transmitted to 2.23 individuals  
249 on average (median across replicates), which is more than twice the number of  
250 transmissions by contacts across all individuals in the network (1.08). Just as with the

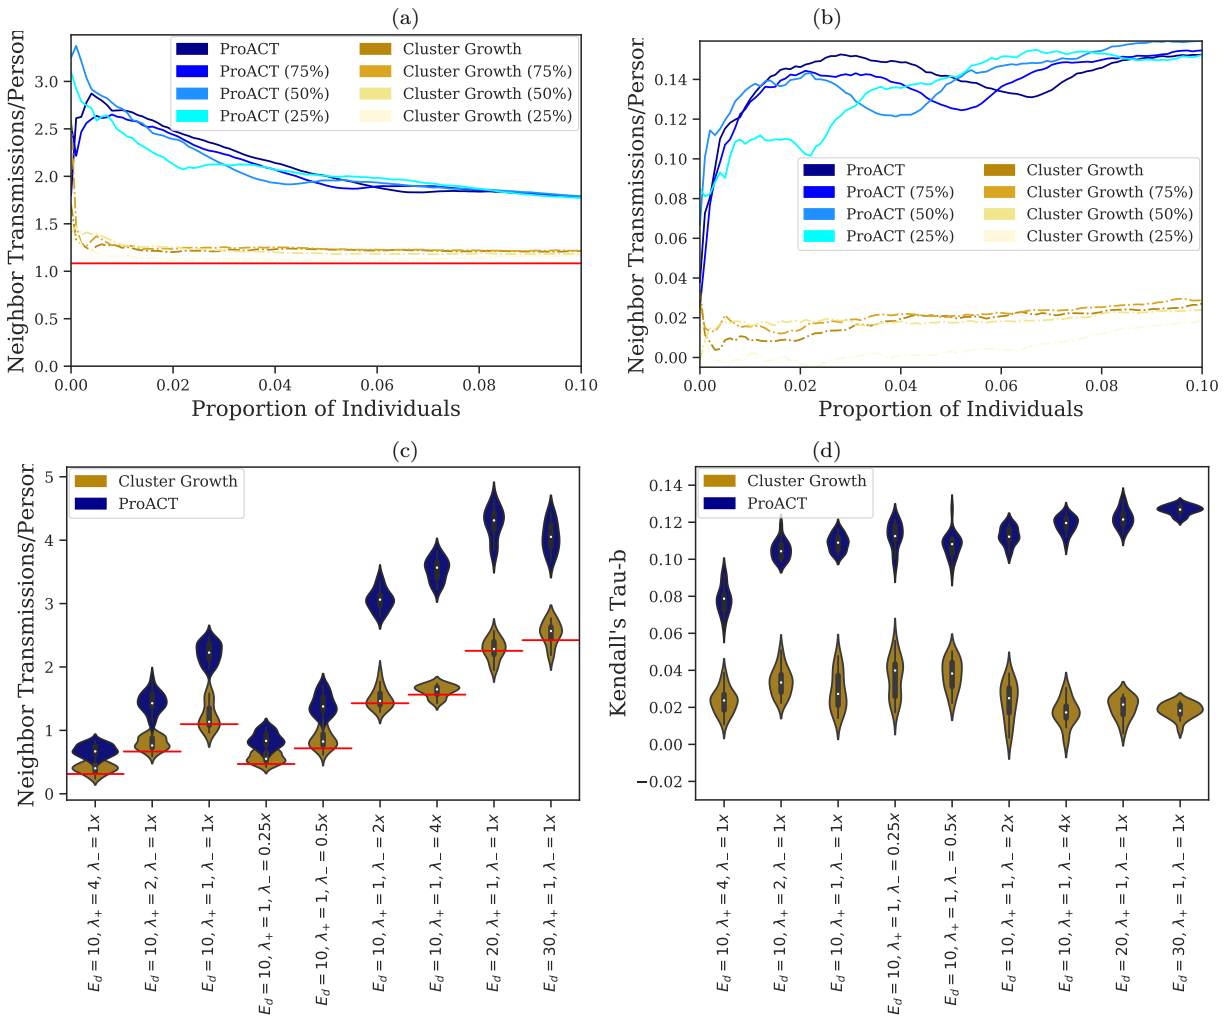

Fig. 3. Second order effects. (a) CMA of the number of infections from contacts of the top individuals according to each ordering; other settings similar to Fig. 2a. (b) Similar to part (a) but adjusted for random and optimal ordering. (c) Number of transmissions from neighbours for the top 1000 individuals in a prioritized list vs. simulation parameter set. (d) Kendall Tau-b correlation between the number of contacts of each individual and their ordering by the two prioritization methods. See Figure S10 for subsampled data.

251 previous outcome measure, advantages of ProACT over random prioritization or cluster  
 252 growth were most pronounced for lower  $\lambda_+$  and higher  $\lambda_-$  (Fig. 3c). The Kendall Tau-b  
 253 coefficients for the correlation between ProACT and the optimal ordering were high  
 254 (Fig. S8); in fact, they were *higher* for the transmissions from contacts compared to  
 255 transmissions from the prioritized person (e.g. median coefficient was 0.084 for contacts  
 256 and 0.033 for the individuals in the default condition). These coefficients were highly  
 257 significant across all models and sampling levels (Fig. S9a). Thus, ProACT was even more

258 effective in finding individuals with active contact than it was for finding individuals who  
259 were not suppressed. These results were largely robust to reduced sampling, showing  
260 similar patterns of average performance but increased variance across replicates (Fig. S8  
261 and S9c–e).

262 Further interrogating the properties of an individual and their ordering, we  
263 observed a substantial correlation between the number of contacts of samples in the sexual  
264 network and their position in the ProACT ordering (Fig. 3d). Thus, while ProACT only  
265 considers the phylogeny, it was able to prioritize those individuals that had high degrees in  
266 the sexual contact network (hidden to ProACT). These correlations were strongest for  
267 networks with high degree and weakest when the rate of diagnosis was very high. Reducing  
268 sampling did not substantially affect these results (Fig. S10).

#### 269 *Real San Diego dataset*

270 We next analyzed a dataset of 926 HIV-1 subtype B *pol* sequences obtained in San  
271 Diego between 1996 and 2018. To evaluate ProACT accuracy, we divided the data into  
272 deciles, with each decile defining two sets: *past* (sequences up to the decile) and *future*  
273 (sequences after the decile). We inferred a phylogeny from the sequences present in the  
274 *past* set using FastTree 2 Price et al. (2010), and we used ProACT to order all samples in  
275 this set. We then evaluated how the outcome measure correlates with the position of each  
276 individual in the ordering. We quantify the correlation using Kendall’s tau-b, a rank  
277 correlation coefficient adjusted for ties Kendall (1938). Values range between -1 and 1,  
278 with -1 signifying perfect inversion, 1 signifying perfect agreement, and 0 signifying the  
279 absence of association.

280 On real datasets, unlike the simulated data, the desired outcome measure, the  
281 number of new transmissions per person, is not known. Instead, we have to use inferred  
282 relationships. HIV-TRACE (used in our cluster growth approach) defines a pair of samples  
283 as “genetically linked” if their sequences are very similar (TN93 distance below 1.5%). We

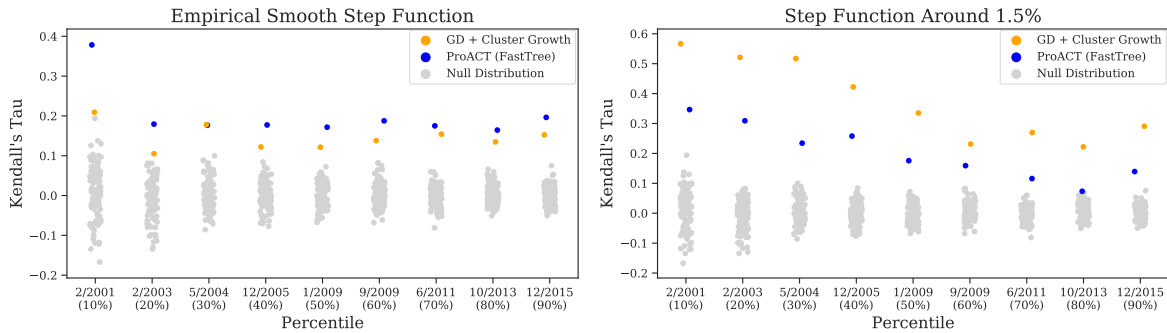

Fig. 4. Kendall's tau-b test results for ProACT ordering on real data using two score functions: an empirical smooth step function and a strict step function around 1.5%. The full San Diego dataset was split into two sets (*pre* and *post*) at each decile (shown on the horizontal axis). The individuals in *pre* were ordered using ProACT and by cluster growth, and they were given a "score" computed using a score function (see Materials and Methods). Kendall's tau-b correlation coefficient was computed for each ordering with respect to the optimal possible ordering (i.e., sorting in descending order of the score). The null distribution was visualized by randomly shuffling the individuals in *pre*, and test *p*-values are shown in Table 2.

284 similarly use the TN93 sequence similarity as an outcome measure, but in addition to  
285 using a fixed threshold, we also use smoother functions (Fig. S11). We measure the number  
286 of linked individuals using a step function (1 if TN93 distance is below 1.5% and 0  
287 otherwise) and an empirical smooth step function determined by fitting a mixture of three  
288 Gaussians to the distribution of pairwise TN93 distances (Material and Methods). We also  
289 explore an analytical smooth step function (parameterized sigmoid). Note that, when the  
290 step function is used, our outcome measure (computed for future transmissions) is exactly  
291 the same as what the cluster growth method uses for prioritizing (albeit, using past data).  
292 Thus, it is reasonable to expect the step function will favor cluster growth. As we move to  
293 smoother functions of distance to count genetic links, our measure is expected to become  
294 less biased in favor of HIV-TRACE.

295 Using both ProACT and cluster growth to prioritize individuals results in orderings  
296 of individuals with positive Kendall's tau-b correlations to the number of future genetic  
297 links regardless of the time (i.e., decile) and the function used to count genetic links  
298 (Fig. 4). These correlations are statistically significant in almost all cases (Table 2 and  
299 Fig. 4). The correlation coefficient ranges between 0.4 (ProACT; 10% time) and 0.1  
300 (cluster growth; 20% time) for empirical function, and between 0.6 (cluster growth; 10%

Table 2. Kendall’s tau-b test for a null hypothesis that a given prioritization yields a total outcome measure no better than random. We show  $p$ -values for the real San Diego dataset for the first through ninth deciles using two outcome measure functions. Tests that failed to reject the null hypothesis with (uncorrected)  $p$ -value  $< 0.00138$  (corresponding to  $\alpha = 0.05$  with a Bonferroni multiple hypothesis testing correct with  $n = 36$ ) are marked with †.

|        | Empirical Smooth Step Function (FastTree) |                      |                    |                    |                    |                     |                     |                     |                     |
|--------|-------------------------------------------|----------------------|--------------------|--------------------|--------------------|---------------------|---------------------|---------------------|---------------------|
|        | 10%                                       | 20%                  | 30%                | 40%                | 50%                | 60%                 | 70%                 | 80%                 | 90%                 |
| GD+CG  | † $2 \times 10^{-3}$                      | † $2 \times 10^{-2}$ | $5 \times 10^{-6}$ | $2 \times 10^{-4}$ | $5 \times 10^{-5}$ | $6 \times 10^{-7}$  | $2 \times 10^{-9}$  | $2 \times 10^{-8}$  | $2 \times 10^{-11}$ |
| ProACT | $5 \times 10^{-8}$                        | $1 \times 10^{-4}$   | $6 \times 10^{-6}$ | $2 \times 10^{-7}$ | $2 \times 10^{-8}$ | $2 \times 10^{-11}$ | $1 \times 10^{-11}$ | $1 \times 10^{-11}$ | $1 \times 10^{-17}$ |

  

|        | Step Function Around 1.5% |                     |                     |                     |                     |                     |                     |                      |                     |
|--------|---------------------------|---------------------|---------------------|---------------------|---------------------|---------------------|---------------------|----------------------|---------------------|
|        | 10%                       | 20%                 | 30%                 | 40%                 | 50%                 | 60%                 | 70%                 | 80%                  | 90%                 |
| GD+CG  | $4 \times 10^{-12}$       | $1 \times 10^{-19}$ | $3 \times 10^{-28}$ | $7 \times 10^{-25}$ | $2 \times 10^{-19}$ | $8 \times 10^{-12}$ | $1 \times 10^{-17}$ | $5 \times 10^{-14}$  | $2 \times 10^{-25}$ |
| ProACT | $1 \times 10^{-5}$        | $5 \times 10^{-8}$  | $3 \times 10^{-7}$  | $2 \times 10^{-10}$ | $1 \times 10^{-6}$  | $1 \times 10^{-6}$  | $1 \times 10^{-4}$  | † $7 \times 10^{-3}$ | $4 \times 10^{-7}$  |

time) and 0.1 (ProACT; 80% time) for the step function.

The comparison between ProACT and cluster growth depends on the choice of the function to count links. When counting the number of links using the step function, prioritization by cluster growth consistently outperforms ProACT for all deciles of the dataset. These results are not surprising, given that we count HIV-TRACE links both to prioritize and to evaluate. However, according to the empirical smooth step function learned from the TN93 distances, ProACT outperforms cluster growth in all except one time point, where they are tied.

To further test whether the smoothness of the link-counting function applied to TN93 distances is a factor in deciding the relative accuracy of methods, we used a sigmoid function to replace the step function while keeping the inflection point at 1.5% (Fig. S11). We observed that as the outcome measure function becomes more smooth, ProACT’s performance improves with respect to prioritization by cluster growth (Fig. 5, Table S1). Based on the more smooth sigmoid function ( $\lambda = 5$ ), ProACT outperforms cluster growth in all but one case where they are tied. Thus, simply counting distances close to 1.5% as partial links leads to evaluations that favor ProACT.

As time increases, both methods experience seemingly downward trends in their tau coefficients, but the null distribution of tau coefficients also tightens (Fig. 4). Thus, both methods consistently do significantly better than expected by random chance and there is



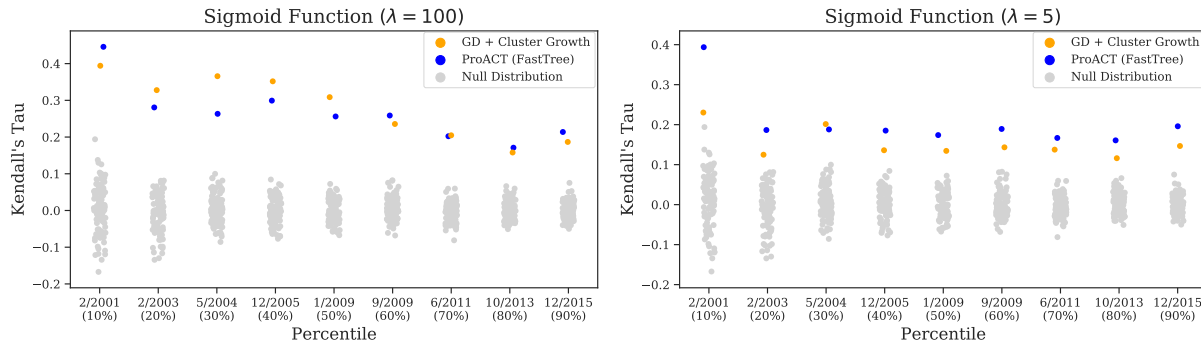

Fig. 5. Kendall's tau-b test results for ProACT ordering on real data using the sigmoid score functions with  $\lambda = 100$  and  $\lambda = 5$ . The full San Diego dataset was split into two sets (*pre* and *post*) at each decile (shown on the horizontal axis). The individuals in *pre* were ordered using ProACT and by cluster growth, and they were given a "score" computed using a score function (see Materials and Methods). Kendall's tau-b correlation coefficient was computed for each ordering with respect to the optimal possible ordering (i.e., sorting in descending order of the score). The null distribution was visualized by randomly shuffling the individuals in *pre*, and test *p*-values are shown in Table S1.

320 no clear relationship between *p*-values of individual tool and time (Table 2). However, both  
321 for the step function and the sigmoid functions, ProACT's relative performance with  
322 respect to cluster growth tends to improved over time.

## 323 DISCUSSION

324 We start by discussing observed results and then comment on practical implications  
325 of this paper both for public health and for future research in molecular epidemics.

### 326 *Discussion of Results*

327 In our simulations, ProACT was least effective in conditions with very low rate of  
328 ART termination, which correspond to very high adherence, or high rates of ART  
329 initiation. As expected, the total number of new infections originated from samples is low  
330 when adherence is high (Fig. S4) reducing the opportunity for improving the ordering.  
331 Thus, ProACT is most beneficial in settings where termination of ART or late diagnosis  
332 lead to individuals who transmit frequently.

333 ProACT was quite robust to impacts of subsampling individuals and only at  $1/4$

334 sampling did we start to lose accuracy. We remind the reader that a  $1/4$  sampling does not  
335 mean that  $1/4$  of all infected individuals are in the dataset. Rather, it means that  $1/4$  of  
336 diagnosed individuals are available to us. Recall that, in our model, diagnosed individuals  
337 are immediately sequenced and put on ART (which they may or may not sustain). At any  
338 point in time, a large partition of individuals who are infected are not diagnosed and thus  
339 not sampled. In other words, the full sampling case should not be misunderstood as  
340 including undiagnosed people. Rather, lack of full sampling corresponds to a case where  
341 some samples are known to *some* clinic but are not included in the study, perhaps due to a  
342 lack of sequencing or data sharing.

343 ProACT far outperformed random ordering. However, we note that, despite the  
344 strong performance, there is much room left for future improvement: ProACT consistently  
345 ranges in its outcome measure between 2% to 8% of the theoretical optimal value when  
346 selecting up to 10% of top-priority samples. Thus, there is great room for improvement in  
347 identifying high-value individuals. It will be unrealistic to expect that any statistical  
348 method based solely on sequence data (and perhaps also commonly available metadata,  
349 e.g. sampling times) will be able to come close to the optimal ordering. Nevertheless, it  
350 remains likely that methods better than ProACT could in fact be developed. Moreover,  
351 here, we used ML methods to infer trees and used mutation rate branch lengths. We made  
352 these choices mostly for computational expediency. However, ProACT algorithm can be  
353 applied on the potentially more accurate Bayesian estimates of the phylogeny. Also, one  
354 can attempt to use ProACT after dating the tree. Whether either adjustment results in  
355 substantial improvements should be studied in the future.

### 356 *Implications of Results*

357 We formalized a useful approach for thinking about the effectiveness of public  
358 health intervention in molecular epidemics. Instead of focusing on the accuracy of methods  
359 of reconstructing phylogenetic trees or transmission networks, a question fraught with

360 difficulties, we asked a more practical question. Given molecular epidemic data, can the  
361 methods, whether phylogenetic or clustering-based, prioritize samples for increased  
362 attention by public health? Using molecular epidemics for prioritization is, of course, not a  
363 new idea. For example, Wertheim et al. (2018) presented a method to prioritize samples  
364 based on the growth rates of their transmission clusters. Vasylyeva et al. (2018) performed  
365 a phylogeographic analysis to reconstruct HIV movement among different locations in  
366 Ukraine in order to infer region-level risk prioritization. Much earlier even, Mellors et al.  
367 (1996) predicted HIV patient prognosis by quantifying HIV RNA in plasma; predicted  
368 prognosis can subsequently be used as a prioritization rank. However, we hope that our  
369 formal definition of the problem as a computational question (i.e., prioritization), in  
370 addition to our extensive simulations and developed metrics of evaluation, will stir further  
371 work in this area. As stated before, it seems likely that more advanced methods than our  
372 simple prioritization approach can improve performance beyond ProACT in the future.

373 ProACT prioritizes individuals, not clusters. Prioritizing treatment followup or  
374 partner tracing for individuals based on their perceived risk of future transmission  
375 promises to be perhaps more effective than targeting clusters. However, such targeted  
376 approaches also pose ethical questions that have to be considered. For example, we may  
377 not want the algorithm to be biased towards particular demographic attributes. ProACT  
378 does not use *any* metadata in its prioritization, reducing risks of such biases. It simply uses  
379 the viral phylogeny. Nevertheless, it is possible that factors such as the depth of the  
380 sampling of a demographic group can in fact change branch length patterns in the  
381 phylogeny and make ProACT less or more effective for certain demographic groups. These  
382 broader implications of individual prioritization and impacts of demographics on the  
383 performance of ProACT should be studied more carefully in future.

384 The main practical question is what can be done with a prioritized list of known  
385 samples. We mentioned that using followups, public health officials can try to ensure  
386 sustenance of ART for prioritized individuals, and using partner tracing, they can target

387 PrEP and HIV testing to contacts of prioritized individuals. Followups, PrEP, and  
388 targeted testing are all expensive and can benefit from prioritization. Interestingly, our  
389 results indicated that ProACT ordering is a function of features of the sexual contact. For  
390 example, we showed that ProACT orders correlate with the degree of nodes in the sexual  
391 network. These results are significant given the fact that ProACT is given no direct data  
392 the sexual network. The fact that ProACT captures (contact) network features means that  
393 even if a prioritized sample is already on ART (and thus unlikely to transmit), his/her  
394 sexual contacts can be good targets for interventive care.

395 One may wonder whether ordering by branch lengths will result in orderings that  
396 fail to change with time and reflect the changes in the epidemic. To answer this question,  
397 on the San Diego PIRC data, we asked how fast the ProACT ordering changes as time  
398 progresses. To do so, we computed Kendall's tau-b correlations to the ProACT ordering  
399 obtained using only the first decile of the dataset (Fig. S12). There was a strong but  
400 diminishing correlation with the initial ordering. The correlations started at 1 (as  
401 expected) and gradually decreased in the ninth decile to 0.522. The results show that as  
402 desired, ProACT orders do in fact change with time, albeit gradually. The gradual change  
403 implies that certain individuals remain high-priority as time progresses. In practical use,  
404 ProACT ordering should be combined with clinical knowledge about the status of  
405 individual patients. For example, high priority individuals according to ProACT can be  
406 given lower priority if they manage to constantly remain suppressed with multiple  
407 followups. More broadly, the ProACT ordering should be considered one more tool for  
408 prioritizing clinical care, but valuable clinical knowledge, not incorporated into the  
409 algorithm, should also be exploited.

410 Finally, a question faced by public health officials is whether the cost of targeting  
411 diagnosed individuals for followups and partner tracing is worth the reduction in future  
412 cases. The answer to that question will inevitably depend on who is targeted. For example,  
413 in our default simulation case, targeting individuals randomly can directly prevent 0.053

414 transmissions per chosen person in the next 12 months, whereas targeting top 1000  
415 individuals according to ProACT would directly target 0.115 transmissions. Thus,  
416 prioritization can in fact change the cost-benefit analyses. Moreover, given a prioritization,  
417 one can use simulations to predict the outcome measure for the top individuals (similar to  
418 Fig. S5) and use metrics such as quality-adjusted life-year (QALY) to estimate how many  
419 top individuals should be targeted for the cost to justify the benefits.

## 420 MATERIALS AND METHODS

### 421 *Simulated Datasets*

422 We use FAVITES to simulate a sexual contact network, transmission network, viral  
423 phylogeny, and viral sequences emulating HIV transmission in San Diego from 2005 to  
424 2014 (Moshiri et al., 2018).

425 Transmissions are modeled using a compartmental epidemiological model with 5  
426 states: Susceptible (S), Acute HIV Untreated (AU), Acute HIV Treated (AT), Chronic  
427 HIV Untreated (CU), and Chronic HIV Treated (CT). Individuals in state S (i.e.,  
428 uninfected) can only transition to state AU. Each infected state  $x \in \{AU, AT, CU, CT\}$   
429 defines a “rate of infectiousness”  $\lambda_{S,x}$ : given an uninfected individual  $u$  in state S who has  
430  $n_x$  sexual partners in state  $x \in \{AU, AT, CU, CT\}$ , the transition of  $u$  from S to AU is a  
431 Poisson process with rate  $\lambda_u = \sum_{x \in \{AU, AT, CU, CT\}} n_x \lambda_{S,x}$ . To mimic reality, where ART  
432 significantly reduces the risk of transmission, rates are chosen such that  
433  $\lambda_{S,AU} > \lambda_{S,CU} > \lambda_{S,AT} > \lambda_{S,CT} \approx 0$ . At the beginning of the epidemic simulation, all  
434 initially uninfected individuals are placed in state S, and all initially infected (i.e., “seed”)  
435 individuals are distributed among the 4 infected states according to their steady-state  
436 proportions. This model is a simplified version of the model proposed by Granich et al.  
437 (2009).

438 Once the transmissions and sample times are obtained, the viral phylogeny evolves  
439 inside the transmission tree under a coalescent model of evolution with logistic within-host

440 viral population growth and a bottleneck event at the time of transmission (i.e., initial  
441 viral population size is 1) (Ratmann et al., 2017). This process produces a separate viral  
442 phylogeny for each seed individual, so we also need a tree for seed individuals. Each *seed*  
443 individual of the epidemic is the root of an independent viral phylogeny, and these trees  
444 were merged by simulating a seed tree with one leaf per seed node under a  
445 non-homogeneous Yule model (Le Gat, 2016) with rate function  $\lambda(t) = e^{-t^2} + 1$  scaled to  
446 have a height of 25 years to match the estimate of the time of the most recent common  
447 ancestor of HIV in San Diego (Moshiri et al., 2018). A mutation rate was sampled for each  
448 branch independently from a truncated normal random variable from 0 to infinity with a  
449 location parameter of 0.0008 and a scale parameter of 0.0005 to scale branch lengths from  
450 years to expected number of per-site mutations (Moshiri et al., 2018).

451 For the most part, we use the base parameters used in Moshiri et al. (2018) that  
452 sought to model the San Diego HIV epidemic from 2005 to 2014, with the following  
453 modifications to better capture reality. See Table S2 for the full set of parameters of the  
454 default condition.

455 *Sexual contact network*— To capture the scale-free nature of the sexual contact  
456 network, Moshiri et al. (2018) used the Barabási–Albert (BA) model (Barabási and Albert,  
457 1999). In addition to the scale-free property, in HIV sexual networks, we typically observe  
458 many densely-connected communities Rothenberg et al. (1998), a property the BA model  
459 fails to directly model. To have control over the number of communities, we simulated  
460 sexual contact networks such that networks contained 20 BA communities, each with 5,000  
461 individuals. In the base condition, the expected degree of connection between an individual  
462 and somebody *within* their community was chosen to be 10, and the expected degree  
463 between an individual and somebody *outside* their community was chosen to be 1. Each  
464 community was simulated separately using the BA model and connections between  
465 communities were chosen uniformly at random, akin to the Erdős–Rényi model (Erdos and  
466 Rényi, 1959). Estimates from the literature put the number of contacts at 3–4 during a

467 single year (Rosenberg et al., 2011). Because our simulated sexual contacts remain static  
468 over the 10 year simulation period, we explore mean degrees between 10 and 30.

469 *Epidemic initialization*— In Moshiri et al. (2018), at the start of the epidemic, all  
470 infected individuals were in state AU. Here, instead, we randomly distribute initially  
471 infected individuals according to expected proportions of the states. To find these  
472 proportions, we ran simulations in which all seed individuals were in state AU, and we  
473 observed the proportion of individuals in each state over time, which reached a  
474 steady-state fairly early in the simulations (Fig. S13).

475 *Time of sequencing*— In Moshiri et al. (2018), viral sequences are obtained from  
476 individuals exactly at the end time of the 10-year simulation period. In reality, however,  
477 HIV patients are typically sequenced when they first visit a clinic to receive ART. Thus, it  
478 is expected that the terminal branch lengths of trees simulated in Moshiri et al. (2018) are  
479 artificially longer than would be expected. Instead, we sample viral sequences from  
480 individuals the first time they begin ART (i.e., the first time they enter state AT or CT).  
481 Our current simulation better captures standards of care in advanced health care systems.

482 *Simulated data analysis*— For each simulated sequence dataset, using FastTree 2  
483 (Price et al., 2010), a phylogenetic tree was inferred under the GTR+ $\Gamma$  model from the  
484 sequences obtained in the first 9 years of the simulation. These trees were then  
485 MinVar-rooted using FastRoot (Mai et al., 2017), and ProACT was run on the resulting  
486 trees.

#### 487 *PIRC San Diego Dataset*

488 To test ProACT on real data, we used a Multiple Sequence Alignment (MSA) of  
489 926 HIV-1 subtype B *pol* sequences from San Diego collected by the UC San Diego  
490 Primary Infection Resource Consortium (PIRC). PIRC is one of the largest longitudinal

491 cohorts of samples in the United States. By design, PIRC strives to include acute  
492 infections (as much as 40% of recruited individuals are during acute or early stages of  
493 infection). Access to the data was obtained through a proposal submitted to PIRC.

494 A phylogenetic tree was inferred from the MSA under the GTR+ $\Gamma$  model using  
495 FastTree 2 (Price et al., 2010), and the resulting tree was MinVar-rooted using FastRoot  
496 (Mai et al., 2017). For each decile, using TreeSwift (Moshiri, 2018), the full tree was  
497 pruned to only contain samples obtained up to the end of that decile. ProACT was run on  
498 each of the resulting trees.

### 499 *Evaluation Procedure*

500 *Simulated data*— To measure the efficacy of a given ProACT selection, because  
501 the true transmission histories are known in simulation, we simply average the number of  
502 infections caused by the individuals in the selection in the last year of simulation (i.e. after  
503 prioritization) to obtain a raw outcome measure.

504 Let  $A = \{1, \dots, n\}$  denote the first,  $\dots$ ,  $n$ -th sampled individual in the current time  
505 step (years 1–9 in our simulations). For each individual  $i$ , let  $c(i)$  denote the number of  
506 individuals directly infected by  $i$  in the next time step (year 10 in our simulations). Given  
507 any set of individuals  $s \subseteq A$ , let  $C(s) = \frac{1}{|s|} \sum_{i \in s} c(i)$  denote the average  $c(i)$  for all  
508 individuals  $i \in s$ .

509 Let  $x = (x_1, \dots, x_n)$  denote an ordering of  $A$ . The (unadjusted) Cumulative Moving  
510 Average (CMA) of  $x$  up to  $i$  is  $C(\{x_1, \dots, x_i\})$ . Let  $o = (o_1, \dots, o_n)$  denote the ordering of  
511  $A$  in which elements are sorted in descending order of  $c(i)$  (i.e., the optimal ordering), with  
512 ties broken arbitrarily. We defined the adjusted CMA of  $x$  up to  $i$  as

$$\frac{C(\{x_1, \dots, x_i\}) - C(A)}{C(\{o_1, \dots, o_i\}) - C(A)}. \quad (0.1)$$

513 We use Equation 0.1 to measure the effectiveness of a selection of the top  $i$  individuals  
514 from each ordering of all individuals. We explore  $i$  for 1 to 10% of the total number of  
515 samples (i.e.,  $\frac{|A|}{10}$ ).



516 *Real data*— The sequences were sorted in ascending order of sample time and, for  
517 each decile, they were split at the decile to form two sets: *pre* and *post*. A phylogenetic tree  
518 was inferred from the sequences in *pre* under the GTR+ $\Gamma$  model using FastTree 2 (Price  
519 et al., 2010) and MinVar-rooted (Mai et al., 2017). Using the resulting tree, ProACT  
520 ordered the samples. Then, pairwise distances were computed between each sequence in  
521 *pre* and each sequence in *post* under the Tamura-Nei 93 (TN93) model (Tamura and Nei,  
522 1993) using the `tn93` tool of HIV-TRACE (Kosakovsky Pond et al., 2018).

523 A natural function to compute the risk of a given individual  $u$  in *pre*, similar to that  
524 proposed by Wertheim et al. (2018), is to simply count the number of individuals in *post*  
525 who are genetic links to  $u$ , i.e.,  $\sum_{v \in \textit{post}} [d(u, v) \leq 1.5\%]$ . In other words, the score function  
526 is simply a step function with value 1 for all distances less than or equal to 1.5% and 0 for  
527 all other distances. However, the selection of 1.5% as the distance threshold, despite being  
528 common practice in many HIV transmission clustering analyses, is somewhat arbitrary,  
529 and a step function exactly at this threshold may be overly strict (e.g. should a pairwise  
530 distance of 1.51% be ignored?).

531 To generalize this notion of scoring links, we utilized three analytical score  
532 functions. The first is the aforementioned step function  $f_1(d) = [d \leq 1.5\%]$ . The second is a  
533 sigmoid function  $f_2(d) = \frac{\lambda+1}{\lambda^{d/0.15} + \lambda}$  with the choice of  $\lambda = 100$  and  $\lambda = 5$  (Fig. S11). The  
534 third is an empirical scoring function learnt from the data by fitting a mixture model of  
535 three Gaussian random variables onto the distribution of pairwise TN93 distances  
536  $f_3(d) = \frac{p_1(x)}{p_1(x)+p_2(x)+p_3(x)}$ , where  $p_1(x)$  is the Probability Density Function (PDF) of the  
537 Gaussian component with smallest mean and  $p_2(x)$  and  $p_3(x)$  are the remaining Gaussian  
538 components (Fig. S11). Specifically, the three Gaussian fits were parameterized by  
539  $(\mu_1=0.0191, \sigma_1=0.0103)$ ,  $(\mu_2=0.0609, \sigma_2=0.0118)$ , and  $(\mu_3=0.118, \sigma_3=0.0468)$ , respectively.

540 For each of these function, for each decile to define *pre* and *post*, we performed a  
541 Kendall's tau-b test to compare the prioritization approaches (Kendall, 1938). To generate  
542 a null distribution in Figure 4, we randomly shuffled the individuals in *pre* repeatedly; note

543 however that the  $p$ -values reported in Table 2 are the theoretical  $p$ -values computed by the  
544 tau-b test, not empirically estimated from our repeated shuffling.

545 ACKNOWLEDGEMENTS

546 We thank Susan B. Little for providing the San Diego HIV sequence dataset used in  
547 this study. We also thank Joel O. Wertheim and Sanjay R. Mehta for fruitful discussions  
548 that helped motivate the development of ProACT.

549 This work was supported by the National Institutes of Health (5P30AI027767-28,  
550 AI100665, AI106039, and MH100974) and a developmental grant from the University of  
551 California, San Diego Center for AIDS Research (P30 AI036214), supported by the  
552 National Institutes of Health.

553 REFERENCES

554 Balaban, M., N. Moshiri, U. Mai, and S. Mirarab. 2019. TreeCluster: clustering biological  
555 sequences using phylogenetic trees. bioRxiv .

556 Barabási, A. L. and R. Albert. 1999. Emergence of scaling in random networks. *Science*  
557 286:509–512.

558 Bbosa, N., D. Ssemwanga, R. N. Nsubuga, J. F. Salazar-Gonzalez, M. G. Salazar,  
559 M. Nanyonjo, M. Kuteesa, J. Seeley, N. Kiwanuka, B. S. Bagaya, G. Yebra,  
560 A. Leigh-Brown, and P. Kaleebu. 2019. Phylogeography of HIV-1 suggests that Ugandan  
561 fishing communities are a sink for, not a source of, virus from general populations.  
562 *Scientific Reports* 9:1051.

563 Cohen, M. S., Y. Q. Chen, M. McCauley, T. Gamble, M. C. Hosseinipour,  
564 N. Kumarasamy, J. G. Hakim, J. Kumwenda, B. Grinsztejn, J. H. Pilotto, S. V.  
565 Godbole, S. Mehendale, S. Chariyalertsak, B. R. Santos, K. H. Mayer, I. F. Hoffman,

- 566 S. H. Eshleman, E. Piwowar-Manning, L. Wang, J. Makhema, L. A. Mills, G. de Bruyn,  
567 I. Sanne, J. Eron, J. Gallant, D. Havlir, S. Swindells, H. Ribaud, V. Elharrar,  
568 D. Burns, T. E. Taha, K. Nielsen-Saines, D. Celentano, M. Essex, and T. R. Fleming.  
569 2011. Prevention of HIV-1 Infection with Early Antiretroviral Therapy. *New England*  
570 *Journal of Medicine* 365:493–505.
- 571 Erdos, P. and A. Rényi. 1959. On Random Graphs I. *Publicationes Mathematicae*  
572 *Debrecen* 6:290–297.
- 573 Gotz, H. M., M. S. van Rooijen, P. Vriens, E. Op de Coul, M. Hamers, T. Heijman,  
574 F. van den Heuvel, R. Koekenbier, A. P. van Leeuwen, and H. A. C. M. Voeten. 2014.  
575 Initial evaluation of use of an online partner notification tool for STI, called 'suggest a  
576 test': a cross sectional pilot study. *Sexually Transmitted Infections* 90:195–200.
- 577 Granich, R. M., C. F. Gilks, C. Dye, K. M. De Cock, and B. G. Williams. 2009. Universal  
578 voluntary HIV testing with immediate antiretroviral therapy as a strategy for  
579 elimination of HIV transmission: a mathematical model. *The Lancet* 373:48–57.
- 580 Kendall, M. G. 1938. A New Measure of Rank Correlation. *Biometrika* 30:81–93.
- 581 Kosakovsky Pond, S. L., S. Weaver, A. J. Leigh Brown, and J. O. Wertheim. 2018.  
582 HIV-TRACE (TRANsmiSSion Cluster Engine): a Tool for Large Scale Molecular  
583 Epidemiology of HIV-1 and Other Rapidly Evolving Pathogens. *Molecular Biology and*  
584 *Evolution* 35:1812–1819.
- 585 Le Gat, Y. 2016. *Recurrent Event Modeling Based on the Yule Process, Volume 2*. ISTE  
586 Ltd, London.
- 587 Leitner, T. and E. Romero-Severson. 2018. Phylogenetic patterns recover known HIV  
588 epidemiological relationships and reveal common transmission of multiple variants.  
589 *Nature Microbiology* 3:983–988.

- 590 Little, S., S. L. K. Pond, C. M. Anderson, J. A. Young, J. O. Wertheim, S. R. Mehta, S. J.  
591 May, and D. M. Smith. 2014. Using HIV networks to inform real time prevention  
592 interventions. *PLoS ONE* 9.
- 593 Mai, U., E. Sayyari, and S. Mirarab. 2017. Minimum variance rooting of phylogenetic trees  
594 and implications for species tree reconstruction. *PLoS ONE* 12.
- 595 Mellors, J. W., C. R. Rinaldo, P. Gupta, R. M. White, J. A. Todd, and L. A. Kingsley.  
596 1996. Prognosis in HIV-1 infection predicted by the quantity of virus in plasma. *Science*  
597 272:1167–1170.
- 598 Moshiri, N. 2018. TreeSwift: a massively scalable Python tree package. *bioRxiv* .
- 599 Moshiri, N., M. Ragonnet-Cronin, J. O. Wertheim, and S. Mirarab. 2018. FAVITES:  
600 simultaneous simulation of transmission networks, phylogenetic trees, and sequences.  
601 *Bioinformatics* Page bty921.
- 602 Nguyen, L. T., H. A. Schmidt, A. Von Haeseler, and B. Q. Minh. 2015. IQ-TREE: A fast  
603 and effective stochastic algorithm for estimating maximum-likelihood phylogenies.  
604 *Molecular Biology and Evolution* 32:268–274.
- 605 Oster, A. M., A. M. France, N. Panneer, M. Cheryl Bañez Ocfemia, E. Campbell,  
606 S. Dasgupta, W. M. Switzer, J. O. Wertheim, and A. L. Hernandez. 2018. Identifying  
607 Clusters of Recent and Rapid HIV Transmission Through Analysis of Molecular  
608 Surveillance Data. *Journal of Acquired Immune Deficiency Syndromes* 79:543–550.
- 609 Poon, A. F., R. Gustafson, P. Daly, L. Zerr, S. E. Demlow, J. Wong, C. K. Woods, R. S.  
610 Hogg, M. Krajden, D. Moore, P. Kendall, J. S. Montaner, and P. R. Harrigan. 2016.  
611 Near real-time monitoring of HIV transmission hotspots from routine HIV genotyping:  
612 an implementation case study. *Lancet HIV* 3:e231–e238.
- 613 Price, M. N., P. S. Dehal, and A. P. Arkin. 2010. FastTree 2 - Approximately  
614 maximum-likelihood trees for large alignments. *PLoS ONE* 5.

- 615 Prosperi, M. C., M. Ciccozzi, I. Fanti, F. Saladini, M. Pecorari, V. Borghi, S. Di  
616 Giambenedetto, B. Bruzzone, A. Capetti, A. Vivarelli, S. Rusconi, M. C. Re, M. R.  
617 Gismondo, L. Sighinolfi, R. R. Gray, M. Salemi, M. Zazzi, and A. De Luca. 2011. A  
618 novel methodology for large-scale phylogeny partition. *Nature Communications* 2:321.
- 619 Ragonnet-Cronin, M., E. Hodcroft, S. Hué, E. Fearnhill, V. C. Delpéch, A. J. L. Brown,  
620 S. Lycett, and S. Hue. 2013. Automated analysis of phylogenetic clusters. *BMC*  
621 *bioinformatics* 14:317.
- 622 Ragonnet-Cronin, M., Y. W. Hu, S. R. Morris, Z. Sheng, K. Poortinga, and J. O.  
623 Wertheim. 2019. HIV transmission networks among transgender women in Los Angeles  
624 County, CA, USA: a phylogenetic analysis of surveillance data. *The Lancet HIV*  
625 6:e164–e172.
- 626 Ratmann, O., E. B. Hodcroft, M. Pickles, A. Cori, M. Hall, S. Lycett, C. Colijn,  
627 B. Dearlove, X. Didelot, S. Frost, A. S. Md Mukarram Hossain, J. B. Joy, M. Kendall,  
628 D. Kuhnert, G. E. Leventhal, R. Liang, G. Plazzotta, A. F. Poon, D. A. Rasmussen,  
629 T. Stadler, E. Volz, C. Weis, A. J. Brown, and C. Fraser. 2017. Phylogenetic tools for  
630 generalized HIV-1 epidemics: Findings from the PANGEA-HIV methods comparison.  
631 *Molecular Biology and Evolution* 34:185–203.
- 632 Romero-Severson, E. O., I. Bulla, and T. Leitner. 2016. Phylogenetically resolving  
633 epidemiologic linkage. *Proceedings of the National Academy of Sciences* 113:2690–2695.
- 634 Rosenberg, E. S., P. S. Sullivan, E. A. Dinunno, L. F. Salazar, and T. H. Sanchez. 2011.  
635 Number of casual male sexual partners and associated factors among men who have sex  
636 with men: Results from the National HIV Behavioral Surveillance system. *BMC Public*  
637 *Health* 11.
- 638 Rothenberg, R. B., J. J. Potterat, D. E. Woodhouse, S. Q. Muth, W. W. Darrow, and A. S.  
639 Klovdahl. 1998. Social network dynamics and HIV transmission. *AIDS* 12:1529–1536.

- 640 Schneeberger, A. D. R. N., C. H. Mercer, S. A. Gregson, N. M. Ferguson, C. A.  
641 Nyamukapa, R. M. Anderson, A. M. Johnson, and G. P. Garnett. 2004. Scale-free  
642 networks and sexually transmitted diseases: a description of observed patterns of sexual  
643 contacts in Britain and Zimbabwe. *Sexually Transmitted Diseases* 31:380–387.
- 644 Smith, D. M., S. J. May, S. Tweeten, L. Drumright, M. E. Pacold, S. L. Kosakovsky Pond,  
645 R. L. Pesano, Y. S. Lie, D. D. Richman, S. D. Frost, C. H. Woelk, and S. J. Little. 2009.  
646 A public health model for the molecular surveillance of HIV transmission in San Diego,  
647 California. *AIDS* 23:225–232.
- 648 Tamura, K. and M. Nei. 1993. Estimation of the number of nucleotide substitutions in the  
649 control region of mitochondrial DNA in humans and chimpanzees. *Molecular Biology*  
650 *and Evolution* 10:512–526.
- 651 Vasylyeva, T. I., M. Liulchuk, S. R. Friedman, I. Sazonova, N. R. Faria, A. Katzourakis,  
652 N. Babii, A. Scherbinska, J. Thézé, O. G. Pybus, P. Smyrnov, J. L. Mbisa,  
653 D. Paraskevis, A. Hatzakis, and G. Magiorkinis. 2018. Molecular epidemiology reveals  
654 the role of war in the spread of HIV in Ukraine. *Proceedings of the National Academy of*  
655 *Sciences* 115:1051–1056.
- 656 Villandré, L., A. Labbe, B. Brenner, R. I. Ibanescu, M. Roger, and D. A. Stephens. 2019.  
657 Assessing the role of transmission chains in the spread of HIV-1 among men who have  
658 sex with men in Quebec, Canada. *PLoS ONE* 14:e0213366.
- 659 Wertheim, J. O., S. L. Kosakovsky Pond, S. J. Little, and V. De Gruttola. 2011. Using  
660 HIV Transmission Networks to Investigate Community Effects in HIV Prevention Trials.  
661 *PLoS ONE* 6:e27775.
- 662 Wertheim, J. O., A. J. Leigh Brown, N. L. Hepler, S. R. Mehta, D. D. Richman, D. M.  
663 Smith, and S. L. Kosakovsky Pond. 2014. The global transmission network of HIV-1.  
664 *Journal of Infectious Diseases* 209:304–313.

REFERENCES

31

- <sup>665</sup> Wertheim, J. O., B. Murrell, S. R. Mehta, L. A. Forgiione, S. L. Kosakovsky Pond, D. M.  
<sup>666</sup> Smith, and L. V. Torian. 2018. Growth of HIV-1 Molecular Transmission Clusters in  
<sup>667</sup> New York City. *The Journal of Infectious Diseases* 218:1943–1953.
